# Supplementary material for: Long-Term Conditioning to Elevated pCO2 and Warming Influences the Fatty and Amino Acid Composition of the Diatom Cylindrotheca fusiformis
Source: PubMed Central journal article supplement (PMC4430207; doi:10.1371/journal.pone.0123945), 2015-05-13
Supplement: pone.0123945.s004.pdf [file pone.0123945.s004.pdf]

**Supplemental Table.**

**Table S1: Relative content (%) of the Individual fatty acids [FA] measured in the diatom *Cylindrotheca fusiformis*.** A total of 24 individual FA were identified and measured. The profile consisted of ~27% polyunsaturated (PUFA), ~ 23% monounsaturated (MUFA) and ~50% saturated (SFA) fatty acids.

| Temp. °C               | 14      | 14   | 14   | 14   | 14   | 14   | 14   | 14   | 14   | 14   | 19   | 19   | 19   | 19   | 19   | 19   | 19   | 19   | 19   |
|------------------------|---------|------|------|------|------|------|------|------|------|------|------|------|------|------|------|------|------|------|------|
| CO <sub>2</sub> (µatm) | 180     | 180  | 180  | 380  | 380  | 380  | 750  | 750  | 750  | 180  | 180  | 180  | 380  | 380  | 380  | 750  | 750  | 750  |      |
| Type                   |         |      |      |      |      |      |      |      |      |      |      |      |      |      |      |      |      |      |      |
| PUFA                   | 18:2n6c | 0.9  | 0.7  | 0.7  | 0.9  | 0.7  | 0.8  | 0.9  | 0.7  | 0.8  | 1.0  | 1.1  | 1.0  | 1.2  | 1.3  | 1.1  | 1.0  | 0.9  | 1.0  |
| PUFA                   | 18:2n6t | 0.1  | 0.1  | 0.1  | 0.0  | 0.0  | 0.0  | 0.1  | 0.1  | 0.0  | 0.1  | 0.0  | 0.0  | 0.0  | 0.0  | 0.0  | 0.0  | 0.0  | 0.0  |
| PUFA                   | 18:3n4  | 0.1  | 0.0  | 0.0  | 0.0  | 0.0  | 0.0  | 0.0  | 0.0  | 0.0  | 0.1  | 0.0  | 0.1  | 0.1  | 0.1  | 0.0  | 0.0  | 0.0  | 0.0  |
| PUFA                   | 18:3n6  | 0.0  | 0.0  | 0.0  | 0.0  | 0.0  | 0.0  | 0.1  | 0.0  | 0.0  | 0.0  | 0.0  | 0.0  | 0.0  | 0.0  | 0.0  | 0.0  | 0.0  | 0.0  |
| PUFA                   | 18:4n3  | 3.8  | 2.9  | 2.4  | 3.7  | 3.2  | 3.9  | 3.7  | 3.1  | 3.5  | 3.4  | 4.0  | 3.8  | 3.4  | 3.5  | 3.0  | 3.9  | 3.9  | 4.0  |
| PUFA                   | 20:3n6  | 0.1  | 0.2  | 0.1  | 0.2  | 0.1  | 0.1  | 0.1  | 0.2  | 0.2  | 0.1  | 0.1  | 0.1  | 0.1  | 0.1  | 0.0  | 0.2  | 0.1  | 0.2  |
| PUFA                   | 20:4n6c | 2.1  | 2.0  | 1.8  | 2.2  | 2.1  | 2.3  | 2.0  | 2.3  | 2.2  | 2.7  | 2.6  | 2.7  | 2.7  | 2.8  | 3.5  | 3.7  | 3.4  | 3.4  |
| PUFA                   | 20:5n3c | 16.5 | 15.1 | 16.4 | 18.0 | 21.2 | 21.7 | 16.3 | 17.9 | 19.0 | 17.7 | 17.0 | 18.4 | 19.4 | 19.1 | 21.4 | 17.2 | 18.8 | 17.0 |
| PUFA                   | 22:2n6c | 0.1  | 0.1  | 0.1  | 0.1  | 0.1  | 0.0  | 0.0  | 0.1  | 0.1  | 0.2  | 0.1  | 0.0  | 0.1  | 0.0  | 0.0  | 0.1  | 0.2  | 0.1  |
| PUFA                   | 22:6n3c | 2.5  | 2.5  | 2.8  | 3.2  | 3.9  | 4.1  | 2.9  | 3.3  | 3.2  | 2.7  | 2.7  | 2.9  | 3.6  | 4.0  | 4.4  | 2.9  | 2.9  | 2.8  |
| MUFA                   | 14:1    | 0.1  | 0.0  | 0.3  | 0.0  | 0.1  | 0.0  | 0.1  | 0.1  | 0.0  | 0.1  | 0.1  | 0.1  | 0.1  | 0.1  | 0.2  | 0.1  | 0.0  | 0.1  |
| MUFA                   | 16:1    | 21.3 | 17.7 | 17.3 | 19.6 | 21.7 | 20.3 | 18.6 | 21.6 | 21.3 | 19.2 | 19.7 | 19.9 | 23.3 | 22.2 | 21.8 | 26.2 | 26.7 | 26.3 |
| MUFA                   | 18:1n9c | 0.6  | 0.8  | 0.6  | 0.4  | 0.5  | 0.6  | 0.6  | 0.8  | 0.6  | 0.4  | 0.6  | 0.5  | 0.5  | 0.6  | 0.4  | 0.5  | 0.5  | 0.5  |
| MUFA                   | 18:1n9t | 0.0  | 0.0  | 0.0  | 0.0  | 0.0  | 0.0  | 0.0  | 0.0  | 0.0  | 0.1  | 0.1  | 0.0  | 0.0  | 0.0  | 0.0  | 0.0  | 0.0  | 0.0  |
| MUFA                   | 20:1n9c | 0.0  | 0.0  | 0.0  | 0.0  | 0.0  | 0.0  | 0.0  | 0.0  | 0.0  | 0.1  | 0.0  | 0.0  | 0.0  | 0.0  | 0.0  | 0.0  | 0.0  | 0.0  |
| MUFA                   | 22:1n9c | 0.1  | 0.0  | 0.3  | 0.0  | 0.2  | 0.1  | 0.3  | 0.2  | 0.0  | 0.1  | 0.0  | 0.0  | 0.0  | 0.0  | 0.0  | 0.0  | 0.0  | 0.0  |
| MUFA                   | 24:1n9c | 0.1  | 0.0  | 0.2  | 0.1  | 0.2  | 0.2  | 0.1  | 0.2  | 0.1  | 0.1  | 0.1  | 0.0  | 0.1  | 0.1  | 0.1  | 0.1  | 0.1  | 0.1  |
| SFA                    | 10:0    | 0.0  | 0.0  | 0.0  | 0.0  | 0.0  | 0.0  | 0.0  | 0.0  | 0.0  | 0.0  | 0.0  | 0.0  | 0.0  | 0.0  | 0.0  | 0.0  | 0.0  | 0.0  |
| SFA                    | 12:0    | 0.1  | 0.1  | 0.1  | 0.1  | 0.1  | 0.1  | 0.1  | 0.1  | 0.1  | 0.1  | 0.1  | 0.0  | 0.1  | 0.1  | 0.1  | 0.0  | 0.0  | 0.0  |
| SFA                    | 14:0    | 22.2 | 23.5 | 19.1 | 24.9 | 20.6 | 19.4 | 24.9 | 20.4 | 21.3 | 19.6 | 20.9 | 19.5 | 20.1 | 19.0 | 19.0 | 19.5 | 19.1 | 19.5 |
| SFA                    | 16:0    | 25.2 | 25.8 | 25.4 | 20.9 | 18.0 | 18.3 | 22.7 | 21.2 | 20.4 | 23.9 | 24.8 | 23.1 | 18.9 | 20.2 | 17.7 | 18.0 | 17.3 | 19.1 |
| SFA                    | 18:0    | 2.8  | 6.8  | 10.3 | 4.9  | 5.8  | 6.2  | 5.4  | 6.5  | 5.2  | 5.2  | 3.4  | 4.3  | 3.7  | 4.8  | 4.3  | 3.5  | 3.3  | 3.6  |
| SFA                    | 20:0    | 0.1  | 0.1  | 0.2  | 0.1  | 0.1  | 0.1  | 0.1  | 0.1  | 0.1  | 0.1  | 0.1  | 0.1  | 0.1  | 0.1  | 0.0  | 0.0  | 0.1  | 0.0  |
| SFA                    | 24:0    | 0.1  | 0.2  | 0.3  | 0.1  | 0.1  | 0.2  | 0.1  | 0.2  | 0.2  | 0.1  | 0.2  | 0.2  | 0.2  | 0.2  | 0.2  | 0.1  | 0.1  | 0.1  |
