# Supplementary material for: Long-Term Conditioning to Elevated pCO2 and Warming Influences the Fatty and Amino Acid Composition of the Diatom Cylindrotheca fusiformis
Source: PubMed Central journal article supplement (PMC4430207; doi:10.1371/journal.pone.0123945), 2015-05-13
Supplement: pone.0123945.s005.pdf [file pone.0123945.s005.pdf]

## Supplemental Table.

**Table S2: Relative content (%) of the Individual amino acids [AA] measured in the diatom *Cylindrotheca fusiformis*.** A total of 12 AA were identified and quantified. The analysis of the specific AA groups showed that the Essential (EA) represented ~40% and Non-essential (NEA) the remaining ~60%.

|             | Temp. °C               | 14    | 14    | 14    | 14    | 14    | 14    | 14    | 14    | 14    | 19    | 19    | 19    | 19    | 19    | 19    | 19    | 19    |  |
|-------------|------------------------|-------|-------|-------|-------|-------|-------|-------|-------|-------|-------|-------|-------|-------|-------|-------|-------|-------|--|
|             | CO <sub>2</sub> (µatm) | 180   | 180   | 180   | 380   | 380   | 380   | 750   | 750   | 750   | 180   | 180   | 380   | 380   | 380   | 750   | 750   | 750   |  |
| <b>Type</b> |                        |       |       |       |       |       |       |       |       |       |       |       |       |       |       |       |       |       |  |
| <b>E</b>    | Val                    | 7.57  | 8.00  | 5.13  | 7.80  | 8.02  | 7.72  | 7.08  | 7.69  | 5.58  | 6.70  | 6.07  | 7.06  | 7.49  | 6.70  | 6.66  | 7.67  | 6.85  |  |
| <b>E</b>    | Ile                    | 5.28  | 5.27  | 3.28  | 6.83  | 5.33  | 6.02  | 5.14  | 5.32  | 3.81  | 5.12  | 4.97  | 5.38  | 4.91  | 4.98  | 4.81  | 6.09  | 5.65  |  |
| <b>E</b>    | Leu                    | 10.75 | 12.06 | 10.67 | 12.75 | 12.26 | 12.39 | 10.57 | 11.27 | 11.88 | 11.00 | 11.89 | 11.60 | 12.25 | 10.85 | 12.29 | 11.80 | 12.46 |  |
| <b>E</b>    | Lys                    | 2.90  | 2.70  | 4.98  | 6.21  | 4.16  | 3.87  | 5.64  | 2.62  | 4.77  | 6.38  | 8.09  | 6.80  | 4.37  | 5.86  | 7.55  | 4.94  | 7.46  |  |
| <b>E</b>    | Met                    | 1.90  | 1.23  | 2.56  | 2.02  | 1.95  | 1.38  | 1.43  | 1.01  | 1.61  | 2.06  | 2.54  | 2.16  | 2.51  | 2.44  | 2.31  | 2.86  | 2.21  |  |
| <b>E</b>    | Phe                    | 5.27  | 6.55  | 5.34  | 7.66  | 5.76  | 6.56  | 5.71  | 5.39  | 6.87  | 5.37  | 6.71  | 6.32  | 6.06  | 5.86  | 6.42  | 5.94  | 6.77  |  |
| <b>NE</b>   | Pro                    | 7.10  | 6.61  | 6.04  | 6.70  | 6.62  | 6.61  | 6.70  | 6.35  | 6.38  | 5.82  | 5.32  | 5.83  | 5.64  | 5.18  | 6.42  | 6.05  | 5.20  |  |
| <b>NE</b>   | Tyr                    | 1.59  | 2.24  | 2.30  | 2.83  | 1.52  | 2.67  | 2.14  | 1.71  | 2.87  | 2.53  | 3.05  | 2.28  | 2.00  | 2.68  | 2.99  | 2.71  | 3.25  |  |
| <b>NE</b>   | Ala                    | 16.03 | 14.16 | 14.14 | 12.81 | 14.83 | 13.52 | 12.82 | 14.75 | 15.43 | 12.87 | 11.50 | 14.35 | 13.45 | 12.19 | 13.31 | 13.71 | 11.04 |  |
| <b>NE</b>   | Asx                    | 13.75 | 13.57 | 14.34 | 12.70 | 14.09 | 12.75 | 15.12 | 13.18 | 14.97 | 13.02 | 12.61 | 11.67 | 13.45 | 13.62 | 12.79 | 12.89 | 12.08 |  |
| <b>NE</b>   | Glx                    | 12.33 | 12.41 | 18.01 | 9.99  | 11.17 | 13.26 | 16.03 | 16.36 | 10.59 | 16.65 | 16.45 | 12.48 | 14.51 | 18.84 | 10.02 | 11.36 | 15.98 |  |
| <b>NE</b>   | Gly                    | 15.54 | 15.21 | 13.21 | 11.71 | 14.27 | 13.25 | 11.62 | 14.35 | 15.24 | 12.48 | 10.81 | 14.08 | 13.35 | 10.82 | 14.43 | 14.00 | 11.04 |  |
