# Supplementary material for: Long-Term Conditioning to Elevated pCO2 and Warming Influences the Fatty and Amino Acid Composition of the Diatom Cylindrotheca fusiformis
Source: PubMed Central journal article supplement (PMC4430207; doi:10.1371/journal.pone.0123945), 2015-05-13
Supplement: pone.0123945.s006.pdf [file pone.0123945.s006.pdf]

## Supplemental Table.

**Table S3: Result of the post-hoc statistical analysis of the fatty acids [FA] amino acids [AA] measured in the diatom *Cylindrotheca fusiformis*.** The values given are p values. Values with  $p < 0.05$  are presented in bold. All treatment combinations are listed. PUFA, MUFA and SFA are poly, mono and saturated fatty acids, respectively. EA and NEA stand for essential and non-essential amino acids.

| Treatment Combination<br>(pCO <sub>2</sub> :Temperature) | Fatty Acids  |       |              | Amino Acids  |              |
|----------------------------------------------------------|--------------|-------|--------------|--------------|--------------|
|                                                          | PUFA         | MUFA  | SFA          | EA           | NEA          |
| <b>380:14-180:14</b>                                     | <b>0.003</b> | 0.999 | <b>0.002</b> | <b>0.039</b> | <b>0.039</b> |
| <b>750:14-180:14</b>                                     | 0.250        | 0.999 | 0.085        | 0.998        | 0.998        |
| <b>180:19-180:14</b>                                     | <b>0.016</b> | 1.000 | 0.113        | 0.187        | 0.187        |
| <b>380:19-180:14</b>                                     | <b>0.001</b> | 0.759 | <b>0.004</b> | 0.202        | 0.202        |
| <b>750:19-180:14</b>                                     | <b>0.025</b> | 0.849 | 0.122        | <b>0.020</b> | <b>0.020</b> |
| <b>750:14-380:14</b>                                     | 0.132        | 0.975 | 0.299        | 0.075        | 0.075        |
| <b>180:19-380:14</b>                                     | 0.289        | 1.000 | 0.234        | 0.987        | 0.987        |
| <b>380:19-380:14</b>                                     | 0.980        | 0.913 | 0.998        | 0.891        | 0.891        |
| <b>750:19-380:14</b>                                     | 0.763        | 0.961 | 0.219        | 0.998        | 0.998        |
| <b>180:19-750:14</b>                                     | 0.994        | 0.989 | 1.000        | 0.310        | 0.310        |
| <b>380:19-750:14</b>                                     | <b>0.043</b> | 0.547 | 0.492        | 0.351        | 0.351        |
| <b>750:19-750:14</b>                                     | 0.709        | 0.653 | 1.000        | <b>0.038</b> | <b>0.038</b> |
| <b>380:19-180:19</b>                                     | 0.102        | 0.866 | 0.401        | 0.999        | 0.999        |
| <b>750:19-180:19</b>                                     | 0.938        | 0.931 | 1.000        | 0.909        | 0.909        |
| <b>750:19-380:19</b>                                     | 0.385        | 1.000 | 0.378        | 0.687        | 0.687        |
